# Supplementary material for: Preparation of bottom-up graphene oxide using citric acid and tannic acid, and its application as a filler for polypropylene nanocomposites
Source: Royal Society of Chemistry journal article supplement (doi:10.1039/d0ra09856f), 2021-01-01
Supplement: d0ra09856f1.pdf [file d0ra09856f1.pdf]

Appendix. Supplementary Information

# **Preparation of bottom-up graphene oxide using citric acid and tannic acid, and its application as a filler for polypropylene nanocomposites**

Huiseob Shin<sup>1</sup>, Min-Young Lim<sup>1</sup>, Jinwoo Oh<sup>2</sup>, Yonghoon Lee<sup>3</sup>, and Jong-Chan Lee<sup>1,\*</sup>

<sup>1</sup>School of Chemical and Biological Engineering and Institute of Chemical Processes, Seoul National University,  
1 Gwanak-ro, Gwanak-gu, Seoul, 08826, Republic of Korea

<sup>2</sup>Photo-Electronic Hybrids Research Center, Korea Institute of Science and Technology (KIST), 5. Hwarang-ro  
14-gil, Seongbuk-gu, Seoul, 02792, Republic of Korea

<sup>3</sup>Chemical Pilot Bldg., S-OIL TS&D Center, 31 Magokjungang 8-ro 1-gil, Gangseo-gu, Seoul, 07793, Korea

Correspondence to: J.-C. Lee (E-mail: [jongchan@snu.ac.kr](mailto:jongchan@snu.ac.kr), Fax: +82-2-880-8899, Tel: +82-2-880-7070)

Figure S1 FT-IR spectrum of BGOs prepared by different weight ratio of CA/TA.

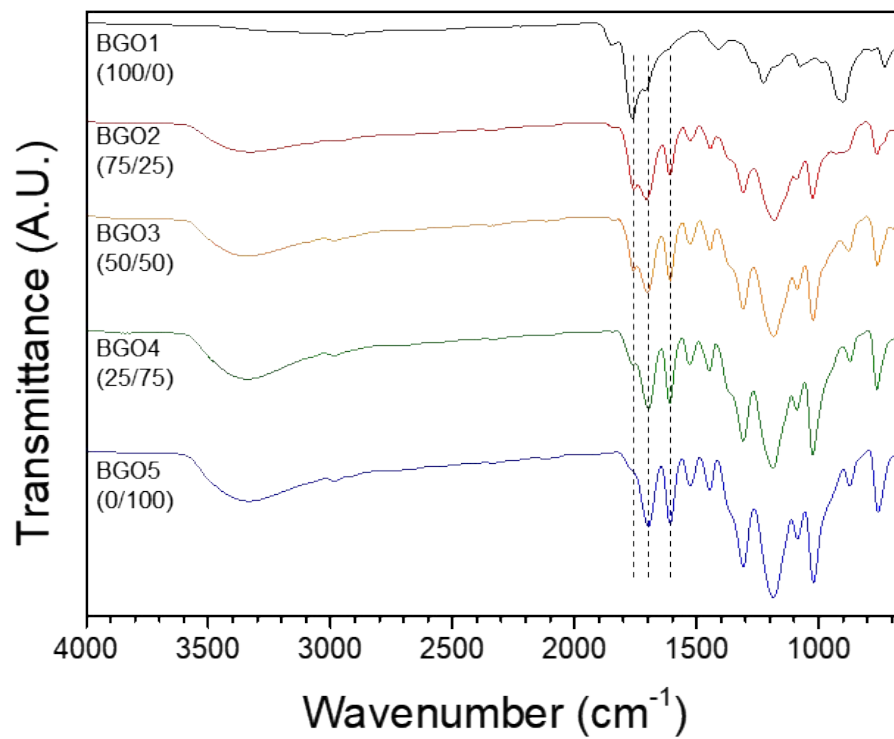

**Figure S2** TEM images of (a) BGO1, (b) BGO2, (c) BGO3, (d) BGO4 and (e) BGO5.

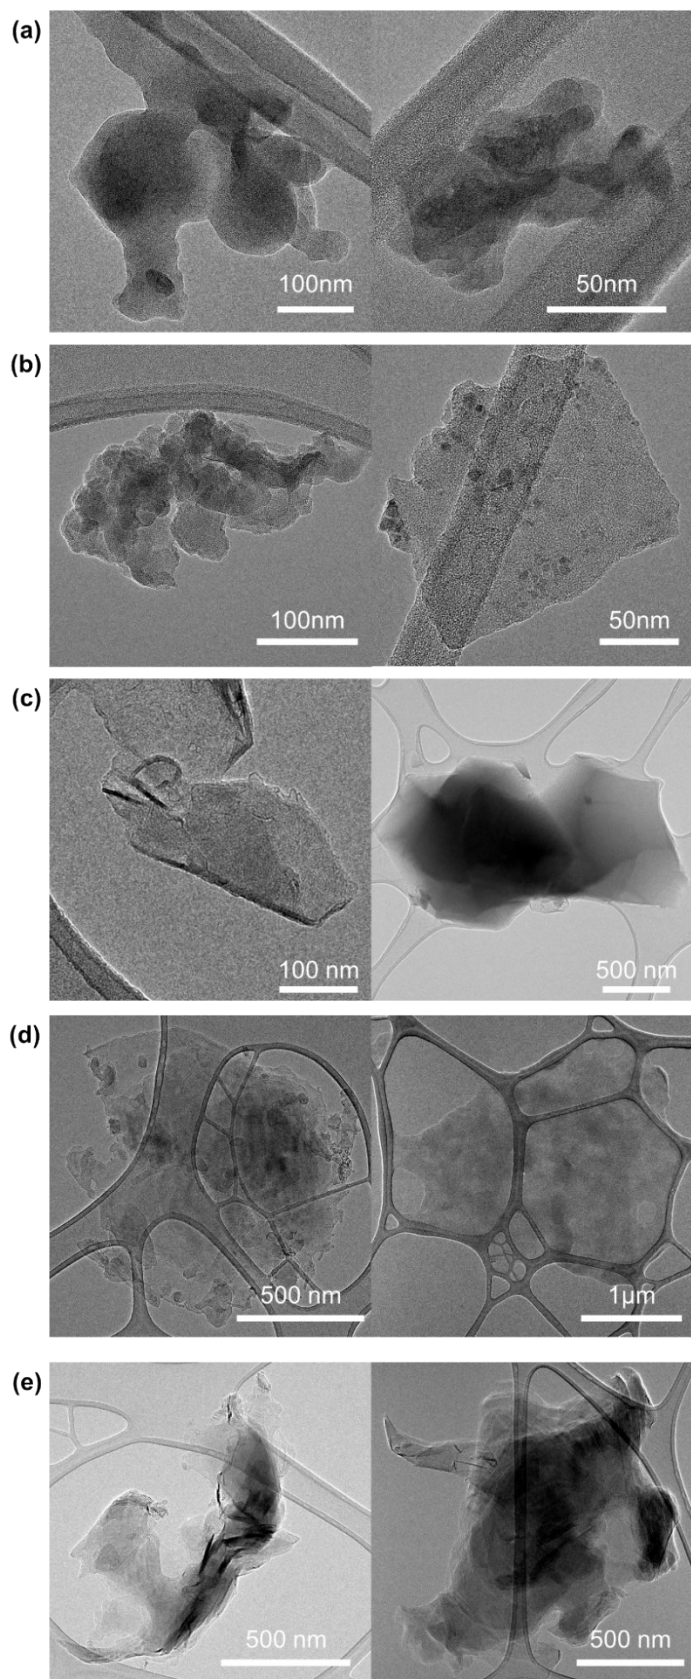

Figure S3 TEM images, AFM image, and height profile of (a) GO and (b) CGO.

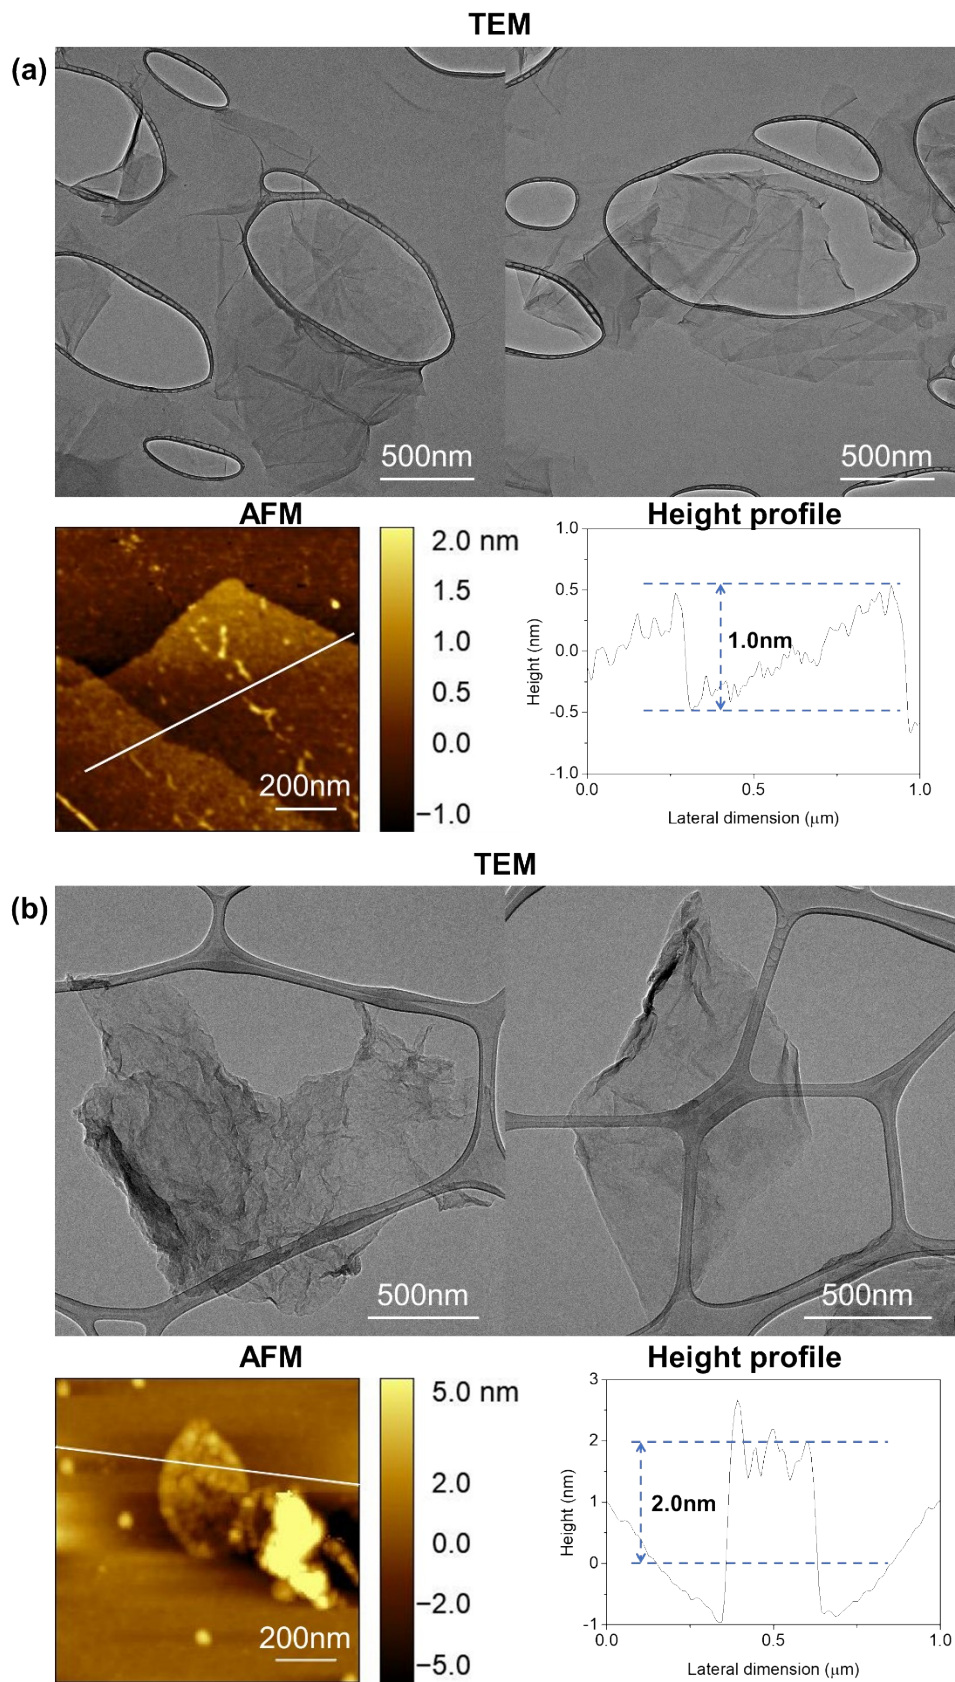

**Figure S4** (a) XPS wide scan spectrum of BGO3 and CBGO3, (b) XPS C1s scan of BGO3, and (c) XPS C1s scan of CBGO3.

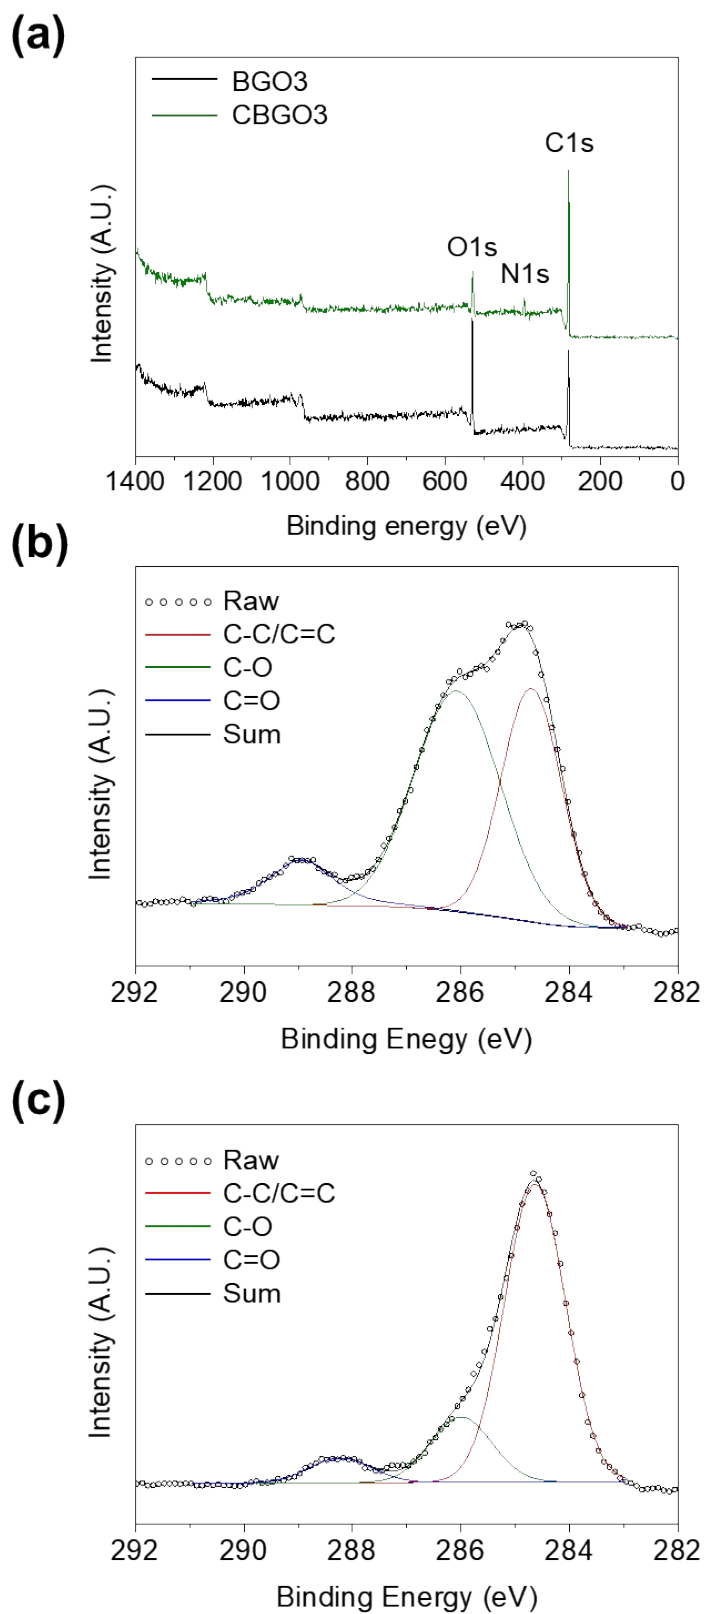

**Figure S5** Tensile test results of PP/BGO3 nanocomposites. (a) Tensile strength, (b) Young's modulus, (c) elongation at break, and (d) representative strain-stress curves.

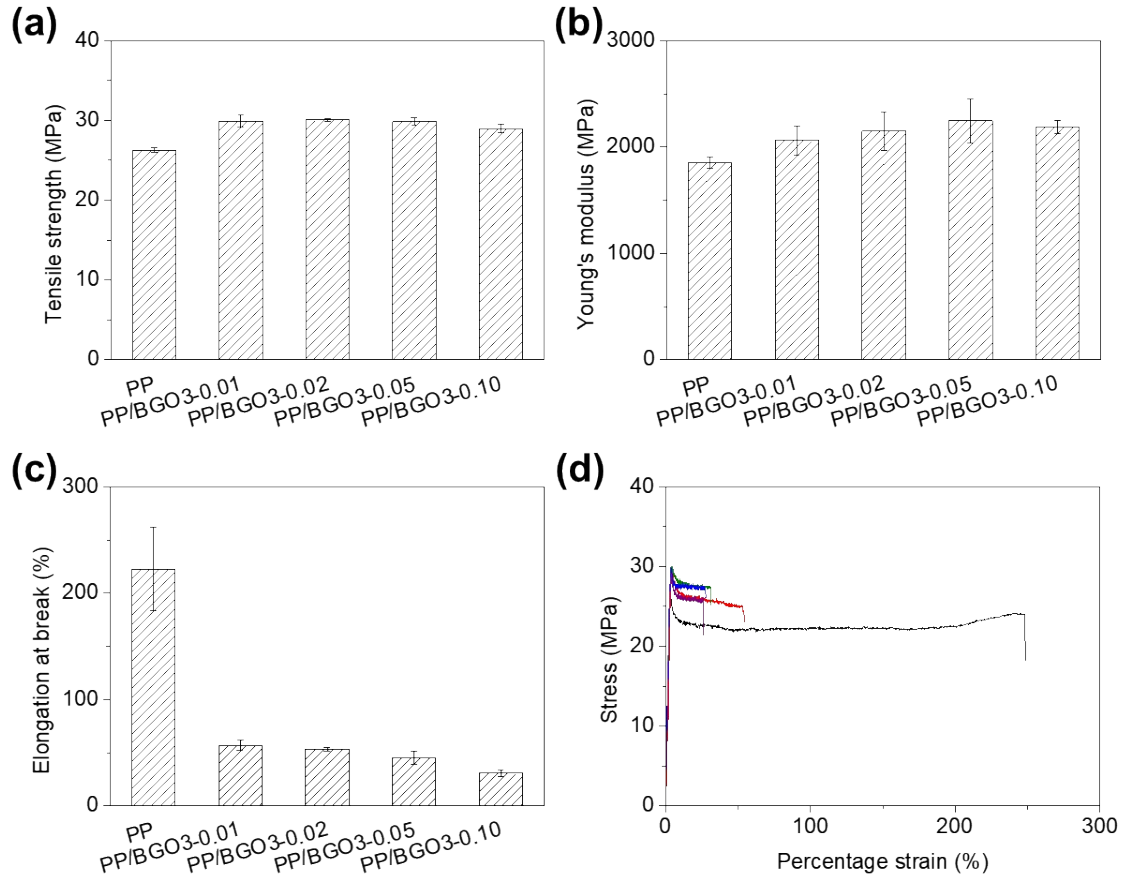

**Figure S6** Tensile test results of PP/CBGO3 nanocomposites. (a) Tensile strength, (b) Young's modulus, (c) elongation at break, and (d) representative strain-stress curves.

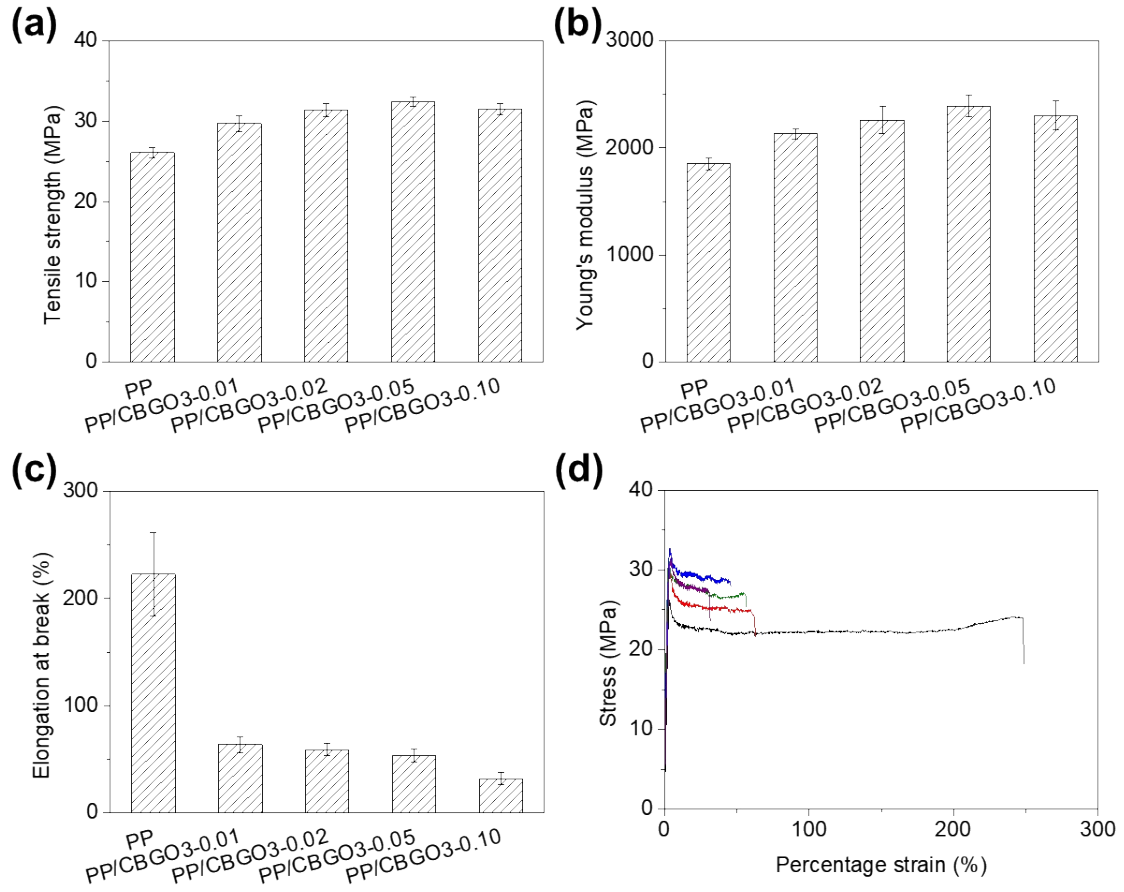

**Figure S7** Tensile test results of PP/GO nanocomposites. (a) Tensile strength, (b) Young's modulus, (c) elongation at break, and (d) representative strain-stress curves.

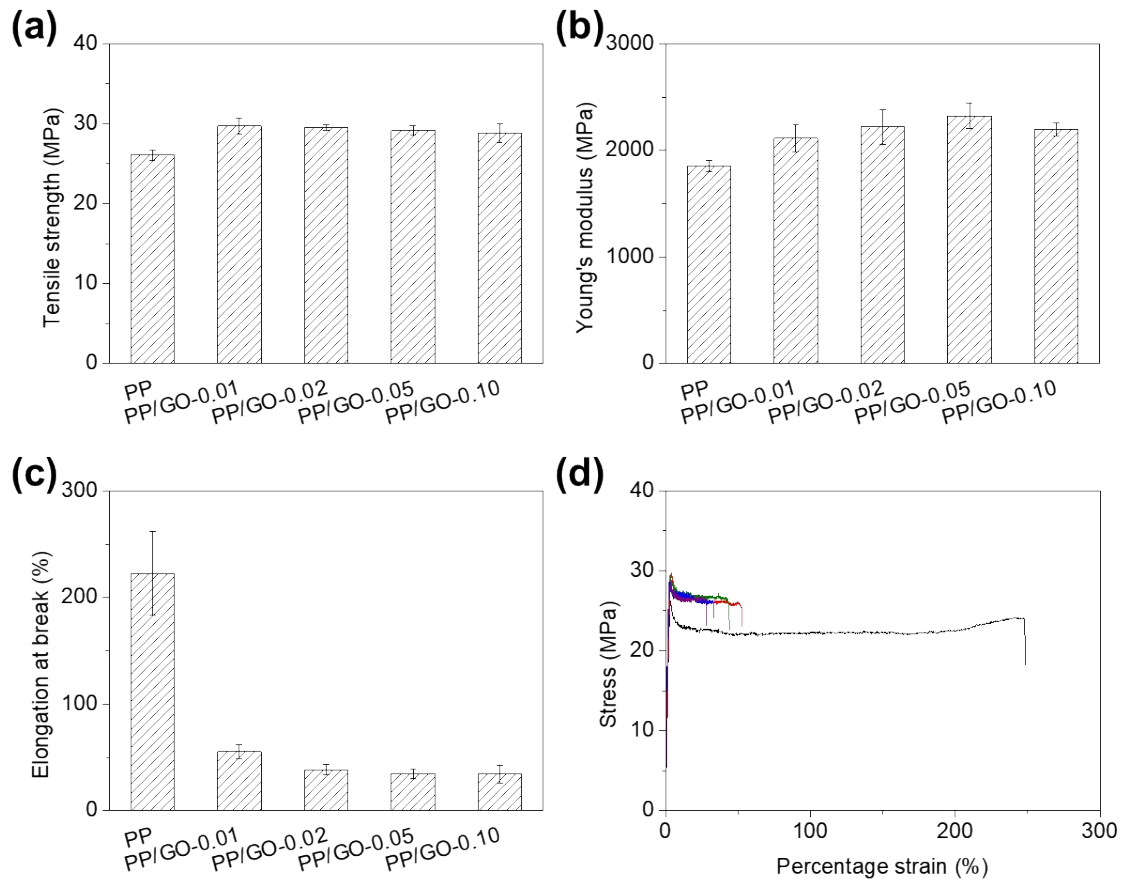



**Figure S8** Tensile test results of PP/CGO nanocomposites. (a) Tensile strength, (b) Young's modulus, (c) elongation at break, and (d) representative strain-stress curves.

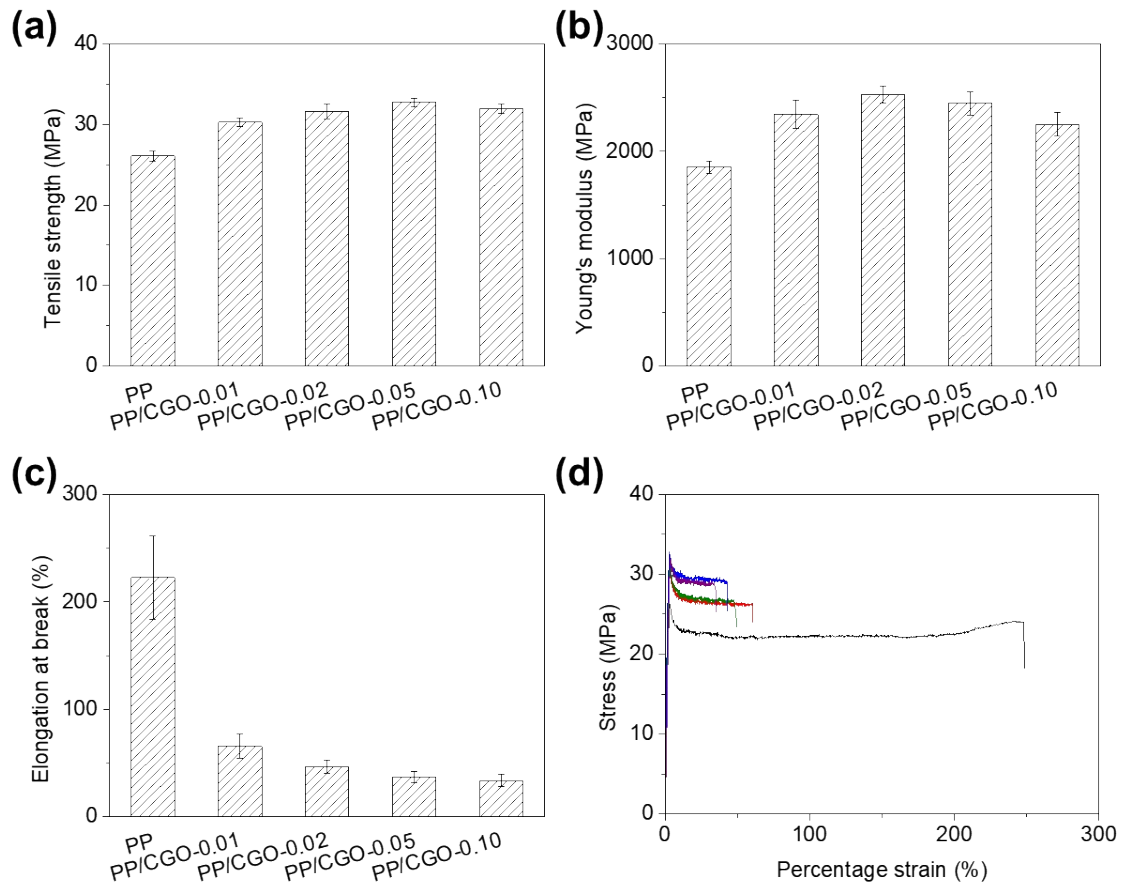

**Figure S9** (a) TGA curves, (b) XRD patterns, (c) DSC cooling curves, and (d) DSC heating curves of pristine PP and PP nanocomposites containing 0.05 wt% of fillers.

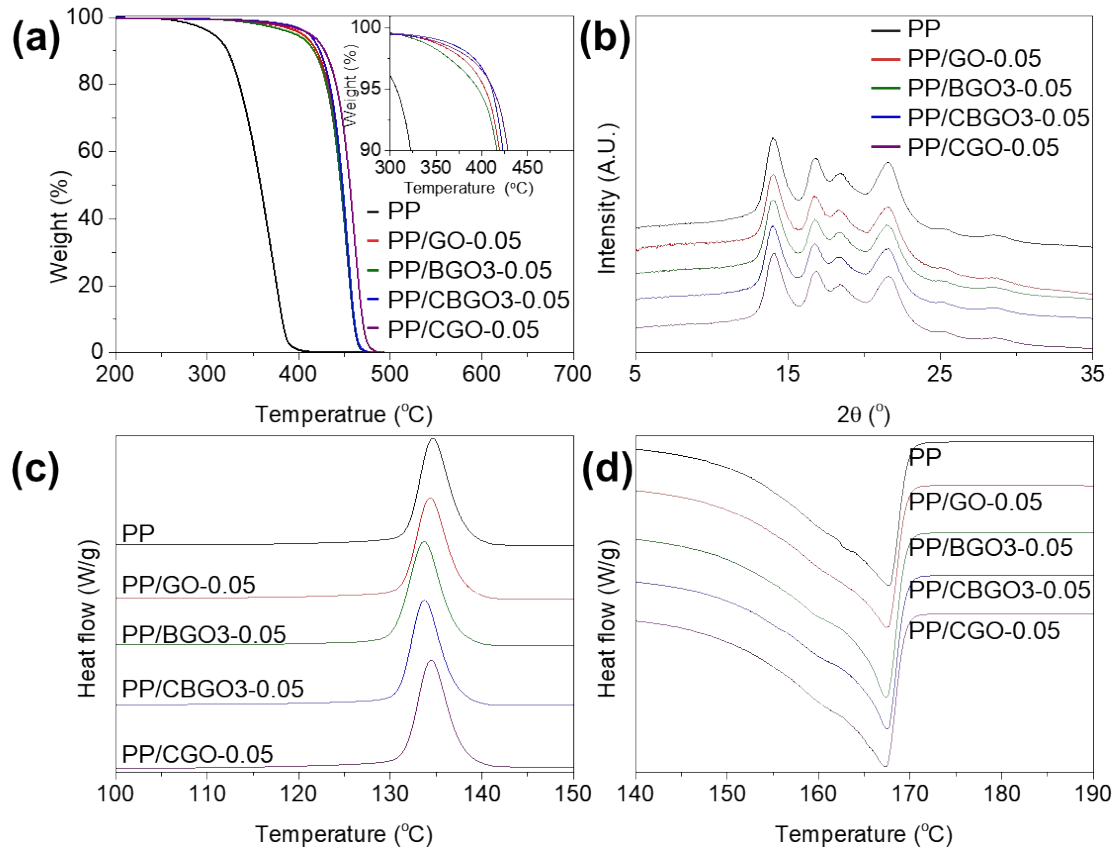

**Figure S10** TGA curves of PP nanocomposites. (a) PP/BGO3, (b) PP/CBGO3, (c) PP/GO and (d) PP/CGO nanocomposites.

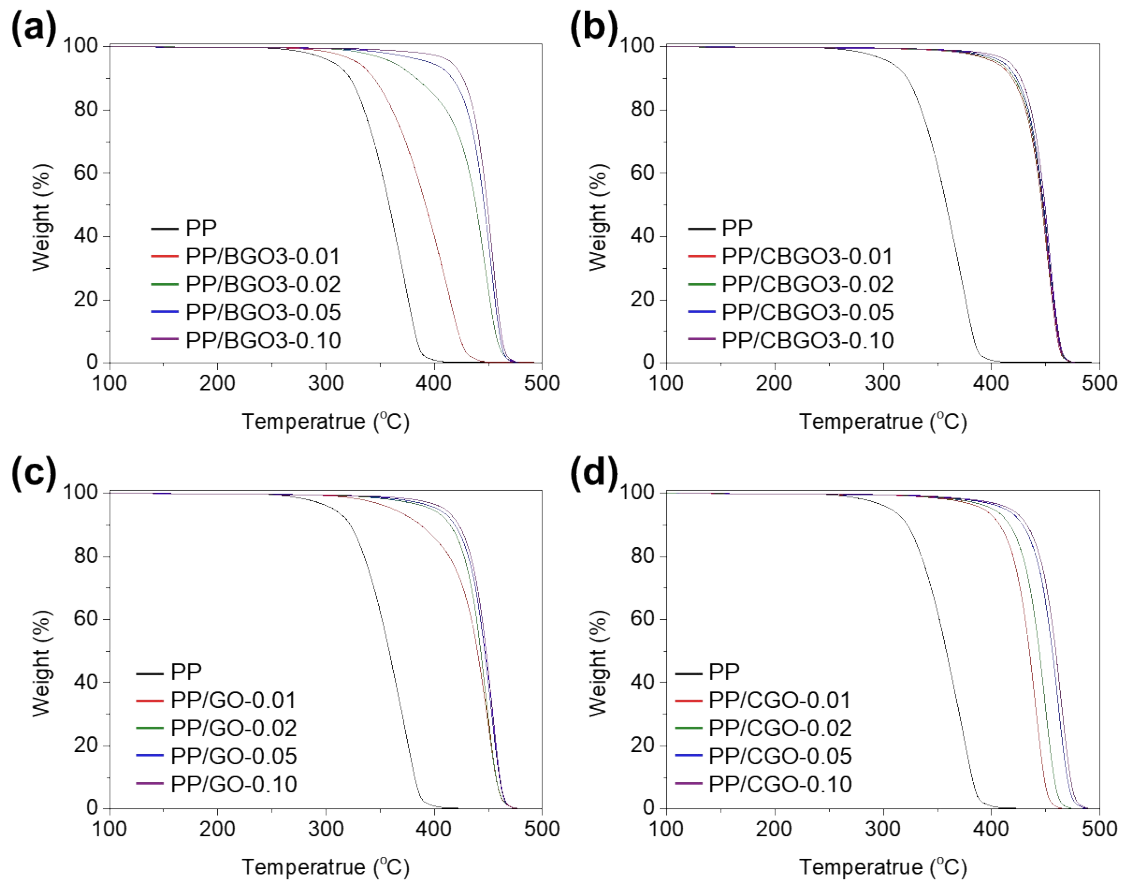

**Figure S 11** XRD patterns of PP nanocomposites. (a) PP/BGO, (b) PP/CBGO3, (c) PP/GO, and (d) PP/CGO nanocomposites.

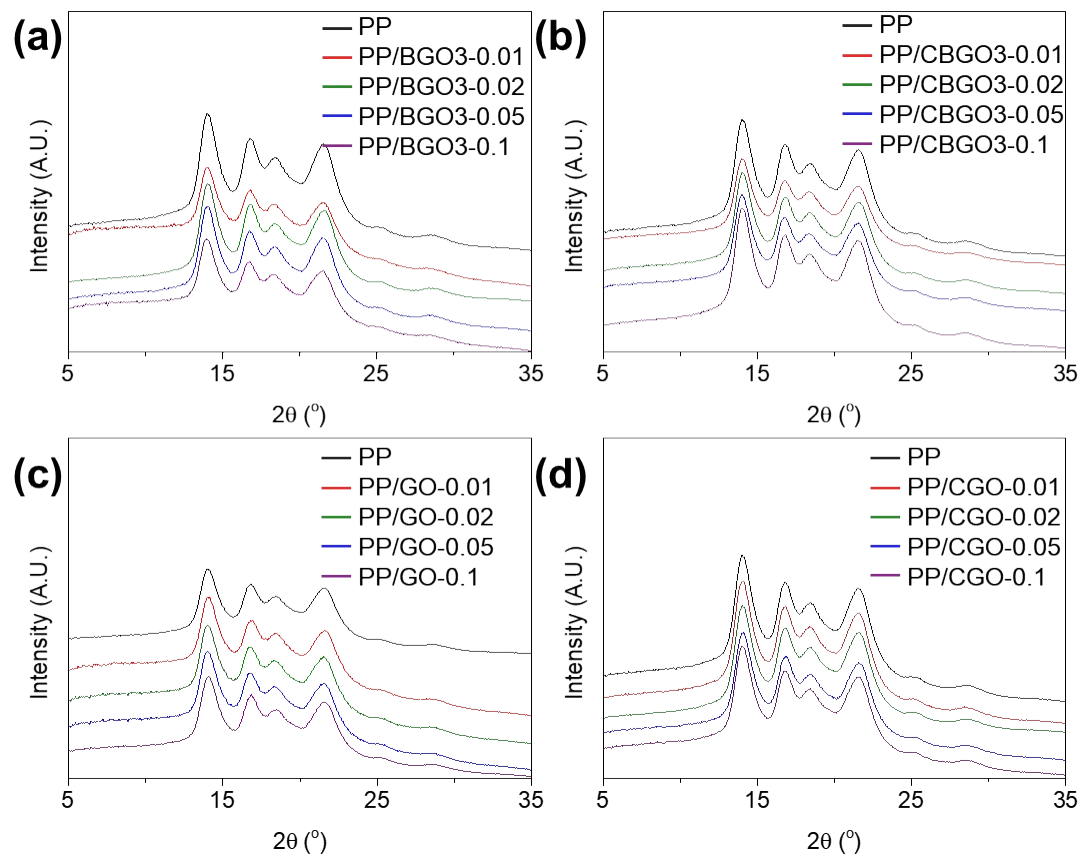

**Figure S 12** DSC results of PP nanocomposites. (a) PP/BGO3 nanocomposites, (b) PP/CBGO3 nanocomposites, (c) PP/GO nanocomposites, and (d) PP/CGO nanocomposites.

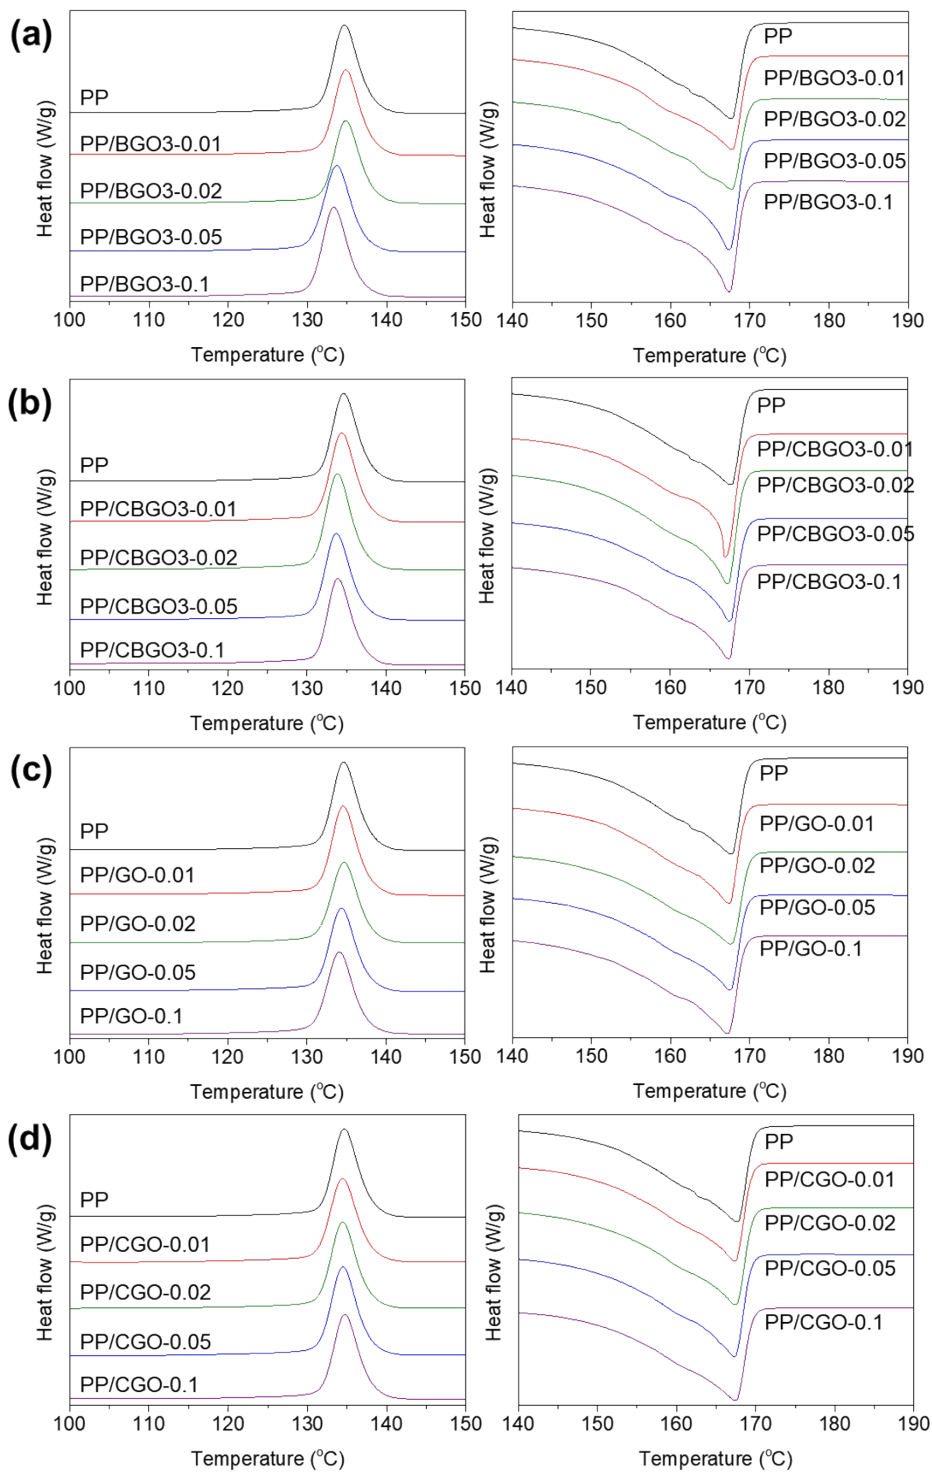

**Figure S13** TEM images of fillers in PP nanocomposites containing 0.05 wt% of fillers. (a) BGO3. (b) CBGO3. (c) GO. (d) CGO.

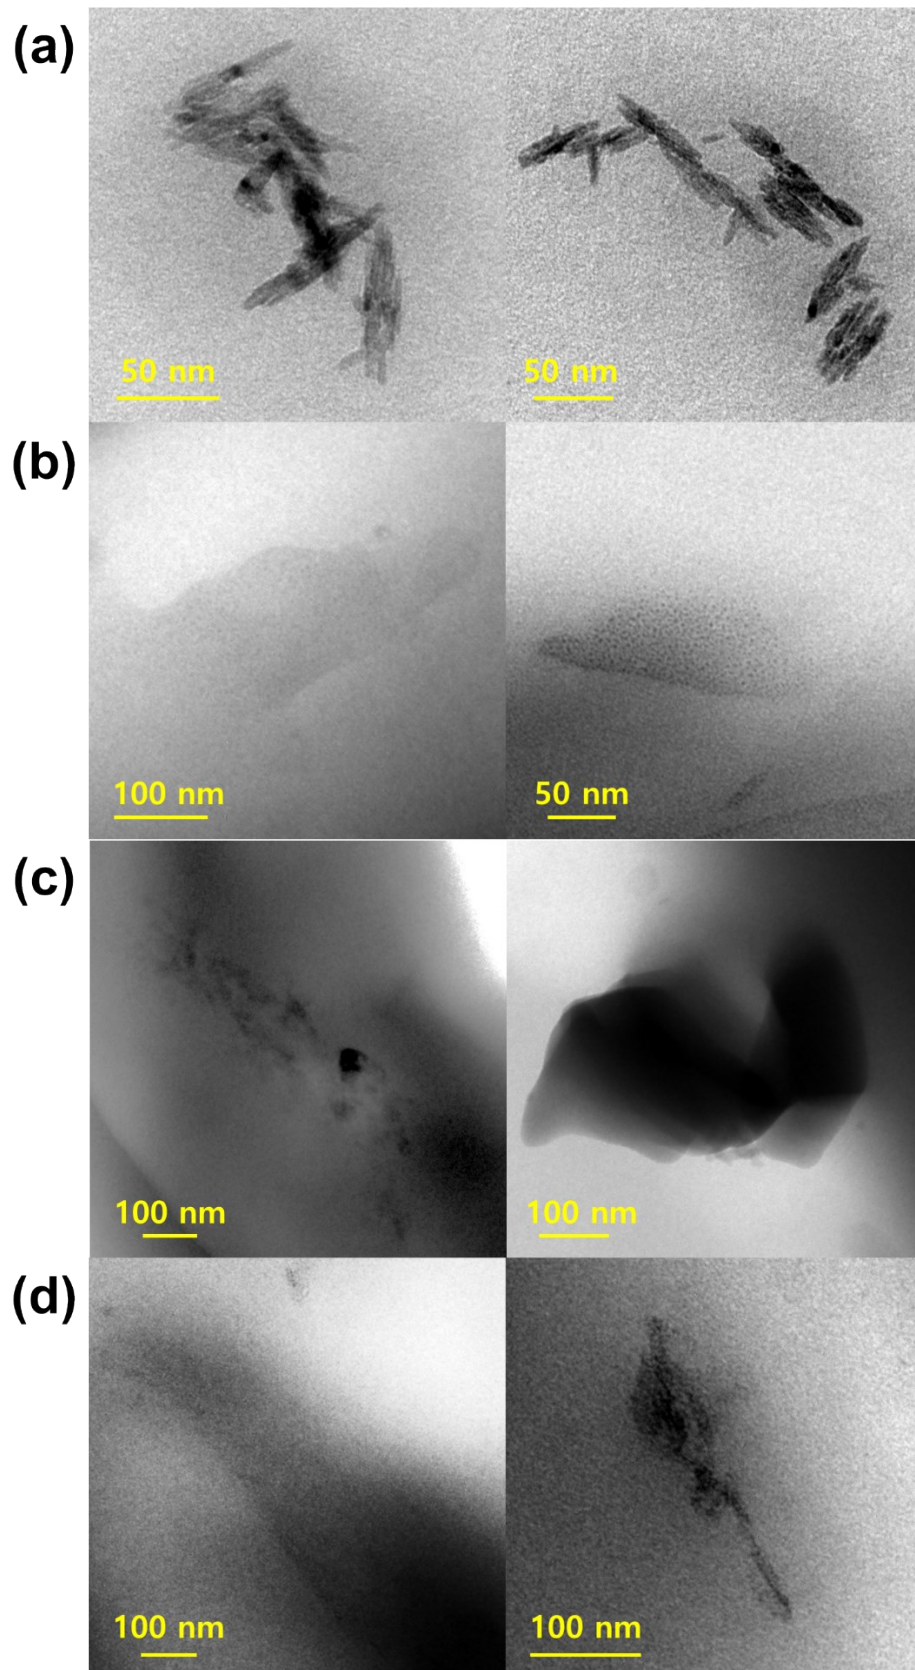

**Figure S 14** DMA results of pristine PP and PP nanocomposites. (a) Storage modulus values. (b) Loss modulus values. (c) Tan  $\delta$  values.

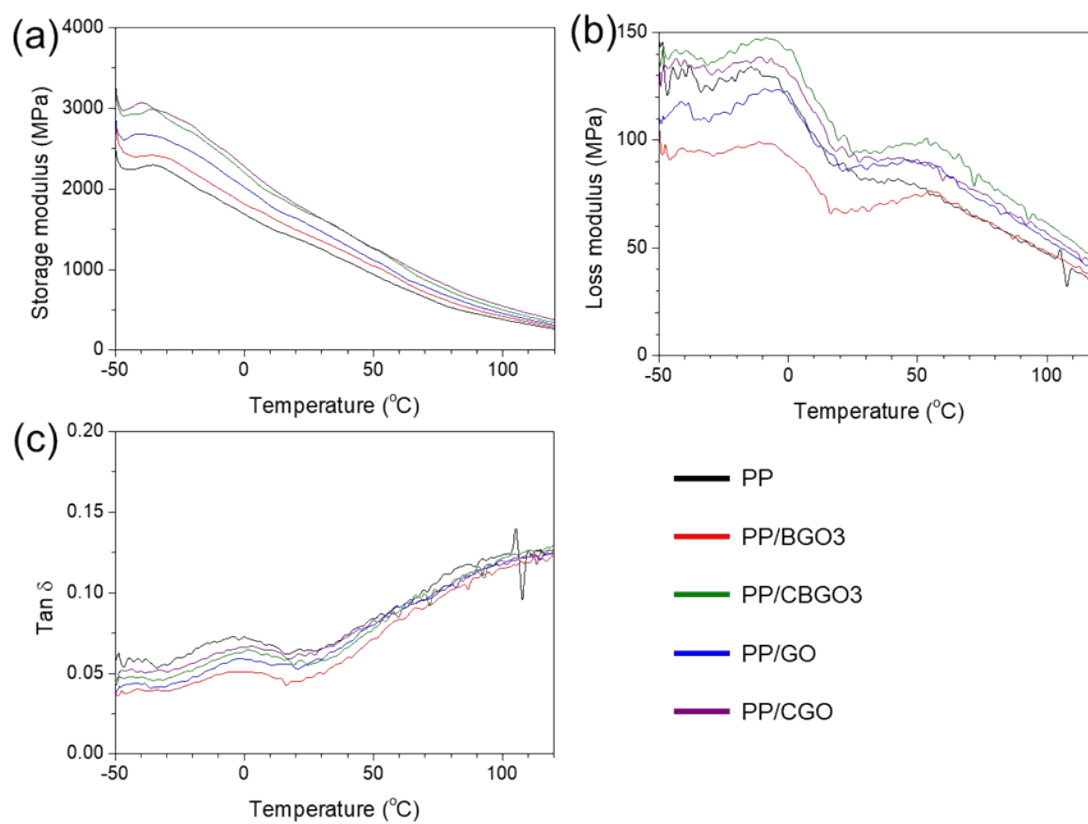

**Table S1** Elemental analysis result of BGOs and CBGO3.

| Sample | CA/TA <sup>a</sup> | Content (wt%) |     |      |     |
|--------|--------------------|---------------|-----|------|-----|
|        |                    | C             | H   | O    | N   |
| BGO1   | 100/0              | 53.3          | 4.1 | 42.5 | 0.0 |
| BGO2   | 75/25              | 55.9          | 4.0 | 40.1 | 0.0 |
| BGO3   | 50/50              | 51.7          | 3.9 | 44.4 | 0.0 |
| BGO4   | 25/75              | 52.8          | 4.2 | 43.0 | 0.0 |
| BGO5   | 0/100              | 51.4          | 3.9 | 44.7 | 0.0 |
| CBGO3  | -                  | 55.2          | 4.8 | 39.4 | 0.6 |

<sup>a</sup> The weight ratio of CA/TA used for the preparation of BGO.



**Table S 2** Mechanical properties and Thermal degradation temperature for 5 wt% loss ( $T_{d,5}$ ) of pristine PP and PP nanocomposites.

| Sample        | Tensile strength<br>(MPa) | Young's modulus<br>(MPa) | Elongation at break<br>(%) | $T_{d,5}$<br>(°C) |
|---------------|---------------------------|--------------------------|----------------------------|-------------------|
| PP            | 26.1±0.3                  | 1853.4±57.1              | 222.7±38.8                 | 307.0             |
| PP/BGO3-0.01  | 29.9±0.7                  | 2061.0±137.6             | 56.9±4.6                   | 329.7             |
| PP/BGO3-0.02  | 30.1±0.1                  | 2152.2±180.1             | 53.2±1.8                   | 362.4             |
| PP/BGO3-0.05  | 29.9±0.5                  | 2247.5±208.4             | 45.0±6.3                   | 396.4             |
| PP/BGO3-0.10  | 29.0±0.5                  | 2186.2±62.1              | 30.7±3.2                   | 416.3             |
| PP/CBGO3-0.01 | 29.7±1.0                  | 2132.3±49.7              | 63.6±7.5                   | 403.6             |
| PP/CBGO3-0.02 | 31.4±0.8                  | 2260.6±124.6             | 58.8±5.6                   | 407.2             |
| PP/CBGO3-0.05 | 32.4±0.6                  | 2392.5±103.6             | 53.2±6.4                   | 411.2             |
| PP/CBGO3-0.10 | 31.5±0.7                  | 2302.3±136.4             | 31.7±5.5                   | 416.9             |
| PP/GO-0.01    | 29.7±1.0                  | 2113.8±130.6             | 55.5±6.6                   | 362.0             |
| PP/GO-0.02    | 29.5±0.4                  | 2219.3±166.8             | 38.3±4.8                   | 397.4             |
| PP/GO-0.05    | 29.1±0.6                  | 2323.7±119.4             | 34.7±4.0                   | 403.3             |
| PP/GO-0.10    | 28.8±1.2                  | 2199.3±60.6              | 34.4±8.2                   | 409.7             |
| PP/CGO-0.01   | 30.3±0.5                  | 2344.5±133.1             | 65.4±11.6                  | 392.5             |
| PP/CGO-0.02   | 31.6±1.0                  | 2526.1±78.4              | 46.3±5.9                   | 401.2             |
| PP/CGO-0.05   | 32.8±0.5                  | 2448.2±109.7             | 36.3±5.4                   | 412.7             |
| PP/CGO-0.10   | 32.0±0.5                  | 2251.6±107.0             | 33.3±5.5                   | 417.6             |

**Table S 3** DSC results of pristine PP and PP nanocomposites.

| Sample        | Cooling           |                  |                         | Heating           |                  |                 |
|---------------|-------------------|------------------|-------------------------|-------------------|------------------|-----------------|
|               | Onset temperature | Peak temperature | Heat of crystallization | Onset temperature | Peak temperature | Heat of melting |
|               | (°C)              | (°C)             | (J/g)                   | (°C)              | (°C)             | (J/g)           |
| PP            | 138.2             | 134.7            | 92.1                    | 152.8             | 167.6            | 87.3            |
| PP/BGO3-0.01  | 138.3             | 134.8            | 87.6                    | 154.4             | 167.7            | 86.2            |
| PP/BGO3-0.02  | 138.3             | 134.9            | 86.0                    | 152.9             | 167.6            | 84.0            |
| PP/BGO3-0.05  | 137.3             | 133.7            | 92.5                    | 159.8             | 167.3            | 89.2            |
| PP/BGO3-0.1   | 136.8             | 133.4            | 90.3                    | 160.4             | 167.4            | 87.8            |
| PP/CBGO3-0.01 | 137.9             | 134.4            | 92.6                    | 165.1             | 166.9            | 87.2            |
| PP/CBGO3-0.02 | 137.4             | 133.9            | 98.8                    | 158.9             | 167.2            | 94.5            |
| PP/CBGO3-0.05 | 137.2             | 133.8            | 89.1                    | 159.5             | 167.4            | 84.0            |
| PP/CBGO3-0.1  | 137.4             | 133.9            | 83.8                    | 158.3             | 167.4            | 77.2            |
| PP/GO-0.01    | 138.1             | 134.6            | 91.8                    | 155.7             | 167.4            | 86.7            |
| PP/GO-0.02    | 138.2             | 134.7            | 89.2                    | 153.2             | 167.6            | 86.7            |
| PP/GO-0.05    | 137.9             | 134.4            | 89.0                    | 156.3             | 167.3            | 84.7            |
| PP/GO-0.1     | 137.6             | 134.1            | 88.1                    | 155.7             | 167.1            | 87.6            |
| PP/CGO-0.01   | 138.1             | 134.4            | 91.3                    | 155.3             | 167.3            | 88.3            |
| PP/CGO-0.02   | 137.9             | 134.4            | 91.0                    | 155.0             | 167.4            | 87.6            |
| PP/CGO-0.05   | 138.0             | 134.5            | 93.5                    | 155.4             | 167.3            | 88.5            |
| PP/CGO-0.1    | 138.2             | 134.7            | 87.0                    | 153.8             | 167.3            | 83.9            |
